# Supplementary material for: Dysbiosis and structural disruption of the respiratory microbiota in COVID-19 patients with severe and fatal outcomes
Source: bioRxiv or medRxiv preprint supplement (doi:10.1101/2021.05.19.21257485), 2021-05-21
Supplement: Supplementary file [file media-1.pdf]

# SUPPLEMENTARY MATERIAL

## Dysbiosis and structural disruption of the respiratory microbiota in COVID-19 patients with severe and fatal outcomes

Alejandra Hernández-Terán<sup>1</sup>, Fidencio Mejía-Nepomuceno<sup>1</sup>, María Teresa Herrera<sup>2</sup>, Omar Barreto<sup>3</sup>, Emma García<sup>3</sup>, Manuel Castillejos<sup>4</sup>, Celia Boukadida<sup>5</sup>, Margarita Matias-Florentino<sup>5</sup>, Alma Rincón-Rubio<sup>5</sup>, Santiago Avila-Rios<sup>5</sup>, Mario Mújica-Sánchez<sup>6</sup>, Ricardo Serna-Muñoz<sup>1</sup>, Eduardo Becerril-Vargas<sup>6</sup>, Cristobal Guadarrama-Pérez<sup>7</sup>, Víctor Hugo Ahumada-Topete<sup>4</sup>, Sebastián Rodríguez<sup>1</sup>, José Arturo Martínez-Orozco<sup>6</sup>, Jorge Salas-Hernández<sup>8</sup>, Rogelio Pérez-Padilla<sup>1</sup>, Joel Armando Vázquez-Pérez<sup>1\*</sup>.

### **S1. Specifics for 16S rRNA gene amplification**

#### **PCR cycles:**

95°C for 3 min, followed by 35 cycles at 95° C for 30s, 55°C for 30s, and 72°C for 30s, with a final extension at 72°C for 5 min

#### **Primers used:**

F - 5' CCTACGGGNGGCWGCAG 3'

R - 5' GACTACHVGGGTATCTAATCC 3'

**Table S2. Wilcoxon paired comparisons of taxa abundance among groups.**

| Taxa/<br>Comparison    | Healthy vs<br>Mild | Healthy vs<br>Severe | Healthy vs<br>Fatal | Healthy vs<br>Non-<br>COVID-<br>19-pneu. | Mild vs<br>Severe | Mild vs<br>Fatal | Mild vs Non-<br>COVID-19-<br>pneu | Severe vs<br>Fatal | Severe vs<br>Non-<br>COVID-<br>19-pneu. | Fatal vs<br>Non-<br>COVID-<br>19-pneu |
|------------------------|--------------------|----------------------|---------------------|------------------------------------------|-------------------|------------------|-----------------------------------|--------------------|-----------------------------------------|---------------------------------------|
| <b>Phylum</b>          |                    |                      |                     |                                          |                   |                  |                                   |                    |                                         |                                       |
| Firmicutes             | NS                 | NS                   | 0.03*               | 0.04*                                    | 0.05*             | NS               | NS                                | 0.02*              | 0.03*                                   | NS                                    |
| Bacteroidetes          | 0.03*              | NS                   | 0.02*               | 0.02*                                    | NS                | NS               | NS                                | NS                 | NS                                      | NS                                    |
| Proteobacteria         | 0.01*              | NS                   | 0.04*               | 0.03*                                    | 0.001**           | NS               | NS                                | NS                 | NS                                      | NS                                    |
| Actinobacteria         | NA                 | NA                   | NA                  | NA                                       | NS                | NS               | 0.003**                           | NS                 | 0.007**                                 | 0.004**                               |
| Fusobacteria           | 0.004**            | 0.02*                | NS                  | 0.0003***                                | NS                | 0.02*            | 0.0004***                         | NS                 | 0.0001***                               | 0.0004***                             |
| TM7                    | 0.0001***          | 0.002**              | 0.006**             | NA                                       | 0.03*             | 0.01*            | NA                                | 0.008**            | NA                                      | NA                                    |
| Synegistetes           | NS                 | 0.01*                | NS                  | NA                                       | 0.004**           | NS               | NA                                | 0.002**            | NA                                      | NA                                    |
| OD1                    | NA                 | NA                   | NA                  | 0.0001***                                | NA                | NA               | NA                                | NA                 | NA                                      | NA                                    |
| GN02                   | NA                 | NA                   | NA                  | 0.0003***                                | NA                | NA               | NA                                | NA                 | NA                                      | NA                                    |
| Plantomycetes          | NA                 | NA                   | NA                  | 0.002**                                  | NA                | NA               | NA                                | NA                 | NA                                      | NA                                    |
| <b>Genus</b>           |                    |                      |                     |                                          |                   |                  |                                   |                    |                                         |                                       |
| <i>Prevotella</i>      | NS                 | NS                   | NS                  | 0.002**                                  | NS                | NS               | 0.001**                           | NS                 | 0.002**                                 | 0.003**                               |
| <i>Streptococcus</i>   | NS                 | 0.006**              | NS                  | NS                                       | 0.01*             | NS               | 0.04*                             | 0.02*              | 0.01*                                   | NS                                    |
| <i>Veillonella</i>     | 0.002**            | 0.003**              | 0.006**             | 0.002**                                  | NS                | NS               | 0.004**                           | NS                 | 0.003**                                 | 0.008**                               |
| <i>Staphylococcus</i>  | 0.0004***          | 0.003**              | 0.0008***           | 0.005**                                  | 0.0007***         | 0.0001***        | 0.006**                           | 0.002**            | NS                                      | 0.01*                                 |
| <i>Moraxella</i>       | 1.2e-05***         | NS                   | NA                  | 0.003**                                  | 1.8e-07***        | NA               | 2.3e-04***                        | NA                 | 0.0003***                               | NA                                    |
| <i>Alloiococcus</i>    | 3.2e-09***         | 2e-08***             | 1.6e-05***          | NA                                       | NS                | 0.0005***        | NA                                | 0.003**            | NA                                      | NA                                    |
| <i>Corynebacterium</i> | 0.0002***          | 1.7e-04***           | 0.02**              | 0.008**                                  | 0.03*             | 0.02*            | 0.02*                             | 0.001**            | 0.002**                                 | NS                                    |
| <i>Actinobacillus</i>  | NS                 | 0.02**               | 0.001**             | NA                                       | 0.03*             | NS               | NA                                | 0.05*              | NA                                      | NA                                    |
| <i>Haemophilus</i>     | NS                 | NS                   | 0.02*               | 0.001**                                  | NS                | 0.05*            | 0.03*                             | NS                 | 0.001**                                 | 0.003**                               |
| <i>Neisseria</i>       | 0.01*              | 0.01*                | NS                  | NA                                       | NS                | NS               | NA                                | NS                 | NA                                      | NA                                    |
| <i>Magasphaera</i>     | NS                 | NS                   | NS                  | 0.001**                                  | NS                | NS               | 0.002**                           | NS                 | 0.004**                                 | 0.001**                               |
| <i>Actinomyces</i>     | 0.008**            | 0.006**              | 0.009**             | 0.02*                                    | NS                | NS               | 0.03*                             | NS                 | 0.03*                                   | 0.007**                               |
| <i>Capnocytophaga</i>  | NS                 | NS                   | NS                  | NS                                       | NS                | NS               | NS                                | NS                 | NS                                      | NS                                    |
| <i>Selenomonas</i>     | 0.003**            | 0.02*                | 0.02*               | NS                                       | NS                | NS               | 0.01*                             | NS                 | 0.05*                                   | NS                                    |

*p*-values corresponds to paired Wilcoxon rank-sum test.

NS= non-significant *p*-value

NA= comparison not available due to absence of such taxa in one of the comparison group.

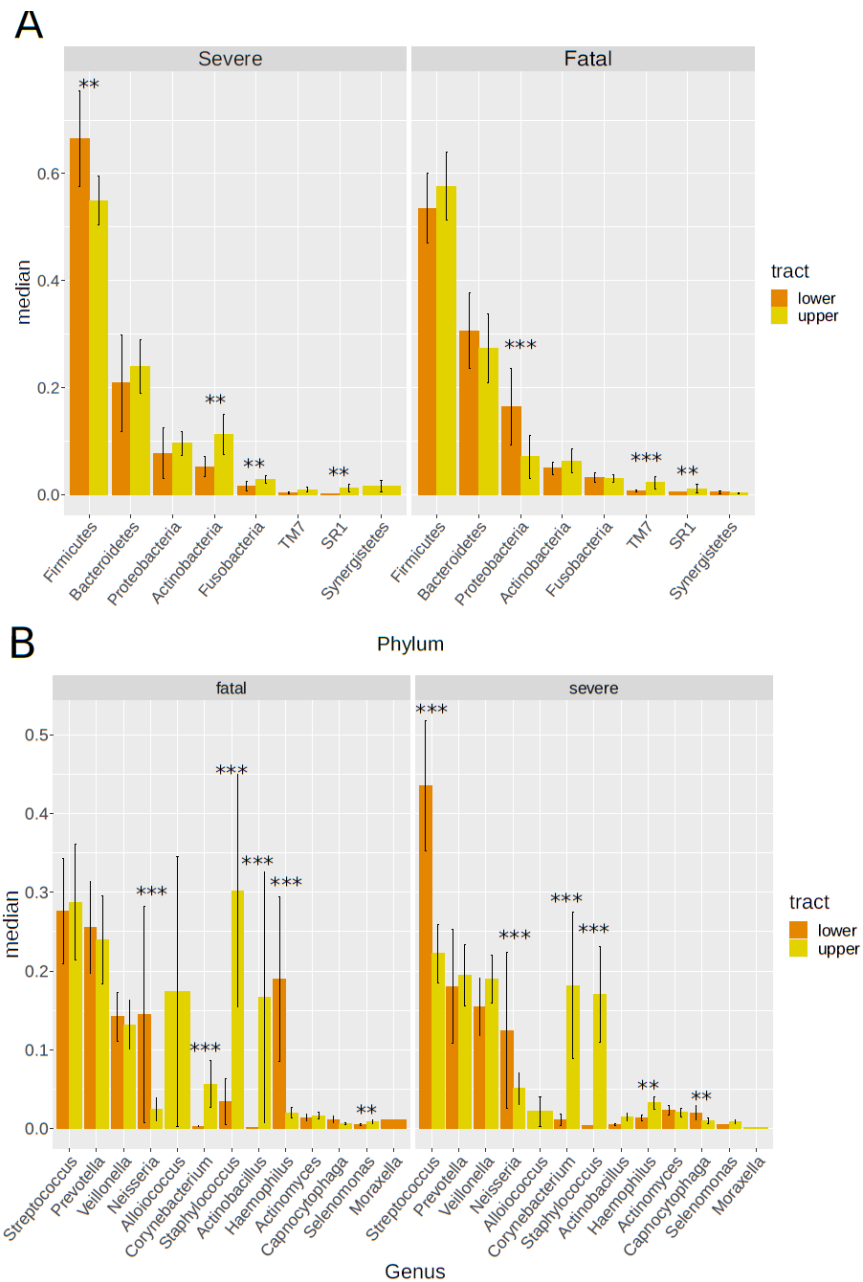

**Figure S3. Main composition at phylum and genus level between lower and upper respiratory tract. A:** median abundance of most abundant phyla in severe and fatal COVID-19. **B:** median abundance of most abundant genera in severe and fatal COVID-19. Asterisks denote statistical differences given by Wilcoxon rank-sum test test ( $p$ -values, \* < 0.05, \*\* < 0.005, \*\*\* < 0.0005).

**Table S4. Ružička metric as a proxy of dysbiosis among severity levels for COVID-19 and controls.**

| Comparison      |                        | Mean similarity |          | Wilcoxon Test <i>p</i> value |
|-----------------|------------------------|-----------------|----------|------------------------------|
| Healthy         | Diseased               | Healthy         | Diseased |                              |
| Healthy control | Mild COVID-19          | 0.94            | 0.89     | 0.05*                        |
|                 | Severe COVID-19        | 0.94            | 0.88     | 0.01*                        |
|                 | Fatal COVID-19         | 0.94            | 0.89     | 0.05*                        |
|                 | Non-COVID-19-pneumonia | 0.94            | 0.97     | 0.08                         |

Intra-treatment similarity for healthy and diseased microbiota in terms of Ružička distance. Statistically significant differences were assessed with Wilcoxon rank-sum test. Dysbiosis was assumed when the similarities between the healthy microbiota samples were significantly higher than the similarities between the diseased microbiota samples (more dispersed).

**Table S5. Topological metrics for all the calculated co-occurrence networks.**

| <b>Metric</b>               | <b>Mild COVID-19</b> | <b>Severe COVID-19</b> | <b>Fatal COVID-19</b> |
|-----------------------------|----------------------|------------------------|-----------------------|
| Number of nodes             | 148                  | 84                     | 74                    |
| Number of edges             | 4758                 | 688                    | 75                    |
| Average number of neighbors | 65.86                | 16.35                  | 2.31                  |
| Diameter                    | 4                    | 5                      | 11                    |
| Radius                      | 2                    | 3                      | 6                     |
| Characteristic path length  | 1.59                 | 1.94                   | 4.99                  |
| Clustering                  | 0.788                | 0.47                   | 0.155                 |
| Density                     | 0.461                | 0.197                  | 0.075                 |
| Heterogeneity               | 0.574                | 0.856                  | 0.512                 |
| Centralization              | 0.391                | 0.563                  | 0.127                 |
| Connected components        | 3                    | 1                      | 14                    |
